# Supplementary material for: The Mediating Role of Major Sport Events in Visitors’ Satisfaction, Dissatisfaction, and Intention to Revisit a Destination
Source: MDPI journal article supplement (doi:10.3390/soc11030078), 2021-07-13
Supplement: s1 [file s1]

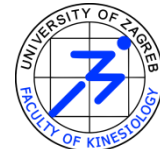

**This questionnaire is for EURBASKET 2015 visitors.** The questionnaire is a part of a research conducted by Croatian basketball federation and Faculty of Kinesiology University of Zagreb and is aimed at evaluating various aspects of EUROBASKET 2015 organisation, as well as possible effects of this championship. Therefore, we kindly ask you to help us with your answers. If you have any questions do not hesitate to contact us by e-mail: [sanela.skoric@kif.hr](mailto:sanela.skoric@kif.hr) **WE THANK YOU FOR YOUR TIME INVESTED IN THIS QUESTIONNAIRE.**

1. Sex: F M

2. Age:

3. Which country do you come from? \_\_\_\_\_

4. What is the reason of your travel to Croatia?

- a) I am in Croatia exclusively because of EuroBasket, otherwise I would not come to Croatia.
- b) I would be here at this moment even if there were no EuroBasket. I am here on a holiday (or some other reason).
- c) I planned to visit Croatia but not at this time. I adjusted the time of the visit to EuroBasket.

5. When did you decide to come to EuroBasket?

- a) Over a year ago
- b) During last year
- c) Last month
- d) Today

6. What mode of transport did you use for coming to EuroBasket, i.e. Zagreb?

- a) Car
- b) Bus
- c) Railway
- d) Airplane
- e) Other \_\_\_\_\_

7. I came to EuroBasket:

- a) Alone (go to question No. 9)
- b) With partner
- c) With family
- d) With friends

8. In case you did not come alone to EuroBasket in Zagreb, how many other members of family/friends arrived with you? \_\_\_\_\_

9. How long will you stay in Zagreb? \_\_\_\_\_ (if you are staying 1 day, i.e. do not spend a night in Zagreb, go to question No. 11)

10. What kind of accommodation did you choose for your stay in Zagreb?

- a) At home / with family/friends
- b) Hotel
- c) Motel
- d) Hostel
- e) Private room/apartment
- f) Other forms of payed accommodation

11. How many games did you see or plan to see? \_\_\_\_\_

12. During your stay in Zagreb, have you visited or plan to visit other places or attractions outside Zagreb? YES NO (got to question No. 14)

13. Please estimate the amount of money you spent or plan to spend (including transportation costs) on visits outside Zagreb \_\_\_\_\_ €

14. Please estimate your transportation costs to Zagreb and from Zagreb \_\_\_\_\_ €

15. Please estimate your average daily expenses on following (in euros):

|                                       |  |
|---------------------------------------|--|
| 15.1. Accommodation                   |  |
| 15.2. Transport (in Zagreb)           |  |
| 15.3. Food and beverage               |  |
| 15.4. Tickets                         |  |
| 15.5. Other not related to EuroBasket |  |

16. How would you rate your satisfaction with following segments of EUROBASKET 2015.

|                                                    | Completely unsatisfied | Somewhat unsatisfied | Nor satisfied nor unsatisfied | Somewhat satisfied | Completely satisfied | Not familiar |
|----------------------------------------------------|------------------------|----------------------|-------------------------------|--------------------|----------------------|--------------|
| 16.1. Schedule and time of the games               | 1                      | 2                    | 3                             | 4                  | 5                    | X            |
| 16.2. The ticket prices                            | 1                      | 2                    | 3                             | 4                  | 5                    | X            |
| 16.3. Availability of the tickets                  | 1                      | 2                    | 3                             | 4                  | 5                    | X            |
| 16.4. Security                                     | 1                      | 2                    | 3                             | 4                  | 5                    | X            |
| 16.5. Layout of the arena                          | 1                      | 2                    | 3                             | 4                  | 5                    | X            |
| 16.6. Atmosphere at the games                      | 1                      | 2                    | 3                             | 4                  | 5                    | X            |
| 16.7. Parking and directions to arena              | 1                      | 2                    | 3                             | 4                  | 5                    | X            |
| 16.8. Promotion of Croatian group of competition   | 1                      | 2                    | 3                             | 4                  | 5                    | X            |
| 16.9. Organisation of EuroBasket in general        | 1                      | 2                    | 3                             | 4                  | 5                    | X            |
| 16.10. Preparation of the town for the EuroBasket  | 1                      | 2                    | 3                             | 4                  | 5                    | X            |
| 16.11. Total satisfaction with your stay in Zagreb | 1                      | 2                    | 3                             | 4                  | 5                    | X            |
| 16.12. Total satisfaction with EuroBasket          | 1                      | 2                    | 3                             | 4                  | 5                    | X            |

17. Is this your first visit to Croatia? YES NO

18. Do you plan to visit Croatia again? YES NO MAYBE
